# Supplementary material for: A Kinome-Wide RNAi Screen in Drosophila Glia Reveals That the RIO Kinases Mediate Cell Proliferation and Survival through TORC2-Akt Signaling in Glioblastoma
Source: PLoS Genet. 2013 Feb 14;9(2):e1003253. doi: 10.1371/journal.pgen.1003253 (PMC3573097; doi:10.1371/journal.pgen.1003253)
Supplement: Table S8 — Human Orthologs for novel modifiers of dEGFRλ;dp110CAAX. Orthologs were curated from http://kinase.com/ and names for each were updated to current NCBI annotations. Human kinases selected for study in human GBM model systems are in bold, as are their Drosophila counterparts. (XLS) [file pgen.1003253.s026.xls]

## Sheet: Sheet1
Table S8: Human Orthologs for novel modifiers of dEGFRλ;dp110CAAX
Table legend: Orthologs were curated from http://kinase.com/ and names for each were updated to current NCBI annotations. Human kinases selected for study in human GBM model systems are in bold, as are their Drosophila counterparts.
kinase name	CG number	human orthologs	dEGFRλ; dp110CAAX interaction
For	CG10033	PRKG1 , PRKG2	SS
Madm	CG1098	NRBP1, NRBP2	S
CG11221	CG11221	SBK1, SBK2, NUAK1	S
CG11660	CG11660	RIOK1	SS
CG11859	CG11859	RIOK2	SS
Tao-1	CG14217	TAOK1, TAOK2, TAOK3	E
Ack	CG14992	TNK1, TNK2	S
Taf1	CG17603	TAF1, TAF1L	SS
CK1alpha	CG2028	CSNK1A1	SS
Drak	CG32666	STK17A/DRAK1, STK17B/DRAK2	S
Cdk7	CG3319	CDK7	SS
Tlk	CG34412	TLK1, TLK2	SS
CG42366	CG42366	MAK	SS
Pitslre	CG4268	CDK11B, CDK11A	E
Cdk9	CG5179	CDK9	SS
Cdk12	CG7597	CDK12	SS
